# Supplementary material for: Sex-Specific Brain Responses to Imaginary Dance but Not Physical Dance: An Electroencephalography Study of Functional Connectivity and Electrical Brain Activity
Source: Frontiers journal article supplement (doi:10.3389/fnbeh.2021.731881), 2021-12-15
Supplement: Table_1.pdf [file Table_1.pdf]

## Supplementary Material

**Table 1. Between-sex/gender differences in test conditions in ICOH.**

|                       |         | pre-rest <sup>b</sup><br>women | post-rest <sup>b</sup><br>women | in-/decreased <sup>c</sup><br>women | pre-rest <sup>b</sup><br>men | post-rest <sup>b</sup><br>men | in-/decreased <sup>c</sup><br>men |
|-----------------------|---------|--------------------------------|---------------------------------|-------------------------------------|------------------------------|-------------------------------|-----------------------------------|
| <b>im<sup>a</sup></b> |         |                                |                                 |                                     |                              |                               |                                   |
| Theta                 | C-Tle   | 0.086                          | 0.080                           | ↓                                   | 0.058                        | 0.079                         | ↑                                 |
|                       | Tle-PO  | 0.079                          | 0.080                           | ↑                                   | 0.056                        | 0.070                         | ↑                                 |
| Alpha                 | Tle-Tri | 0.088                          | 0.087                           | ↓                                   | 0.089                        | 0.091                         | ↑                                 |
|                       | Tle-PO  | 0.090                          | 0.106                           | ↑                                   | 0.072                        | 0.078                         | ↑                                 |
| Beta                  | F-Tri   | 0.077                          | 0.074                           | ↓                                   | 0.081                        | 0.080                         | ↓                                 |
|                       | Tle-Tri | 0.073                          | 0.071                           | ↓                                   | 0.085                        | 0.078                         | ↓                                 |

**Note:** Pre- and post-rest measurement results of ICOH belonging to the statistically significant differences between men and women in COH. Left column – statistically significant different electrode pairs of COH, middle column – pre- and post-rest measurement values of women, right column – pre- and post-rest measurement values of men.

<sup>a</sup>im: imagined dance without music

<sup>b</sup>pre- and post-rest: pre- and post-rest-measurement value in women and men.

<sup>c</sup>arrow up: ICOH increased from pre- to post-rest measurement in women resp. in men, arrow down: ICOH decreased from pre- to post-rest measurement in women resp. in men

**Table 2. Within-sex/gender differences between test conditions in ICOH in men.**

|                              |        | pre-rest 1 <sup>b</sup> | post-rest 1 <sup>b</sup> | in-/decreased 1 <sup>c</sup> | pre-rest 2 <sup>b</sup> | post-rest 2 <sup>b</sup> | in-/decreased 2 <sup>c</sup> |
|------------------------------|--------|-------------------------|--------------------------|------------------------------|-------------------------|--------------------------|------------------------------|
| <b>da-m*im-m<sup>a</sup></b> |        |                         |                          |                              |                         |                          |                              |
| Alpha                        | C-Tri  | 0.103                   | 0.122                    | ↑                            | 0.094                   | 0.092                    | ↓                            |
| Beta                         | C-Tri  | 0.082                   | 0.091                    | ↑                            | 0.074                   | 0.079                    | ↑                            |
| <b>da-m*im<sup>a</sup></b>   |        |                         |                          |                              |                         |                          |                              |
| Alpha                        | C-Tri  | 0.103                   | 0.122                    | ↑                            | 0.092                   | 0.103                    | ↑                            |
|                              | Tri-PO | 0.093                   | 0.102                    | ↑                            | 0.086                   | 0.080                    | ↓                            |
| Beta                         | C-Tri  | 0.082                   | 0.091                    | ↑                            | 0.075                   | 0.081                    | ↑                            |
|                              | Tri-PO | 0.067                   | 0.075                    | ↑                            | 0.068                   | 0.071                    | ↑                            |

**Note:** Pre- and post-rest measurement results of ICOH belonging to the statistically significant differences between test conditions of the COH in men.

Left column – statistically significant different electrode pairs of COH in men between test conditions, middle column – pre- and post-rest measurement values of test condition 1, right column – pre- and post-rest measurement values of test condition 2.

<sup>a</sup>Test condition pairs, da-m: physically executed dance with music, im-m: imagined dance with music, im: imagined dance without music

<sup>b</sup>Pre- and post-rest 1: pre- and post-rest-measurement value of the left test condition from test condition pair, pre- and post-rest 2: pre- and post-rest-measurement value of the right test condition from test condition pair.

<sup>c</sup>arrow up: ICOH increased from pre- to post-rest measurement of the left resp. right test condition from test condition pair, arrow down: ICOH decreased from pre- to post-rest measurement of the left resp. right test condition from test condition pair.
